# Supplementary material
Source: Elsevier journal article supplement (https://www.sciencedirect.com/science/article/pii/S0214460320301078)
Supplement: mmc1 [file S0214460320301078:mmc1.pdf]

## **ANEXO: Evaluación de las habilidades motoras y praxias orales**

**Elaborado por: Nidia Zambrana Toledo**

**Nombre:**

**Edad:**

**Fecha:**

### **Labios**

1. Proyección: ( ) normal

- ( ) con temblor
- ( ) desplazada a la derecha
- ( ) desplazada a la izquierda
- ( ) con dificultades de ejecución
- ( ) sin movimiento

2. Retracción: ( ) normal

- ( ) con temblor
- ( ) desplazada a la derecha
- ( ) desplazada a la izquierda
- ( ) con dificultades de ejecución
- ( ) sin movimiento

3. Lateralización a la derecha: ( ) normal

- ( ) con dificultades de ejecución
- ( ) sin movimiento

4. Lateralización a la izquierda: ( ) normal

- ( ) con dificultades de ejecución
- ( ) sin movimiento

5. Vibración: ( ) normal

- ( ) sin movimiento

## **Lengua**

1. Tocar las comisuras labiales: ( ) normal
  - ( ) sin movimiento a la derecha
  - ( ) sin movimiento a la izquierda
  - ( ) con temblores
  - ( ) con asociación de movimientos mandibulares
  
2. Tocar la parte interna de las mejillas: ( ) normal
  - ( ) sin movimiento a la derecha
  - ( ) sin movimiento a la izquierda
  - ( ) con temblores
  - ( ) con asociación de movimiento mandibulares
  
3. Elevar y bajar la punta lingual (hacia el centro de los labios superior e inferior):
  - ( ) sin dificultades
  - ( ) sin elevar
  - ( ) sin bajar
  - ( ) con temblores
  - ( ) con asociación de movimientos mandibulares
  
4. Protrucción y retracción: ( ) sin dificultades
  - ( ) con apoyo de los labios
  - ( ) sin movimientos
  - ( ) con temblores
  - ( ) con asociación de movimientos mandibulares
  
5. Vibración de la punta lingual: ( ) normal
  - ( ) sin movimiento
  
6. Estallido de la punta lingual contra el paladar duro: ( ) normal
  - ( ) sin movimiento
  
7. Estrechamiento de la punta lingual: ( ) normal
  - ( ) sin movimiento

## **Mejillas**

Inflar: ( ) normal

( ) solo del lado derecho

( ) solo del lado izquierdo

( ) sin movimiento

Retraer: ( ) normal

( ) solo del lado derecho

( ) solo del lado izquierdo

( ) sin movimiento

## **Paladar Blando**

Elevación: ( ) normal

( ) sin movimiento de los dos lados

( ) sin movimiento del lado derecho

( ) sin movimiento del lado izquierdo

( ) poca elevación

( ) aspecto corto

Obs: observase la movilidad del paladar blando durante la emisión de las vocales: (oral/nasal) /a/ /ã/.

## **Mandíbula**

1. Lateralización: ( ) normal

( ) exagerada hacia la derecha

( ) exagerada hacia la izquierda

( ) limitada hacia la derecha

( ) limitada hacia la izquierda

2. Proyección anterior: ( ) normal

( ) exagerada

( ) limitada

( ) desplazada a la derecha

( ) desplazada a la izquierda

3. Apertura: ☐ normal  
☐ excesiva  
☐ limitada  
☐ desplazada a la derecha  
☐ desplazada a la izquierda
